# Supplementary figures and images for: Human blood-labyrinth barrier on a chip: a unique in vitro tool for investigation of BLB properties
Source: Royal Society of Chemistry journal article supplement (doi:10.1039/d3ra04704k), 2023-01-01

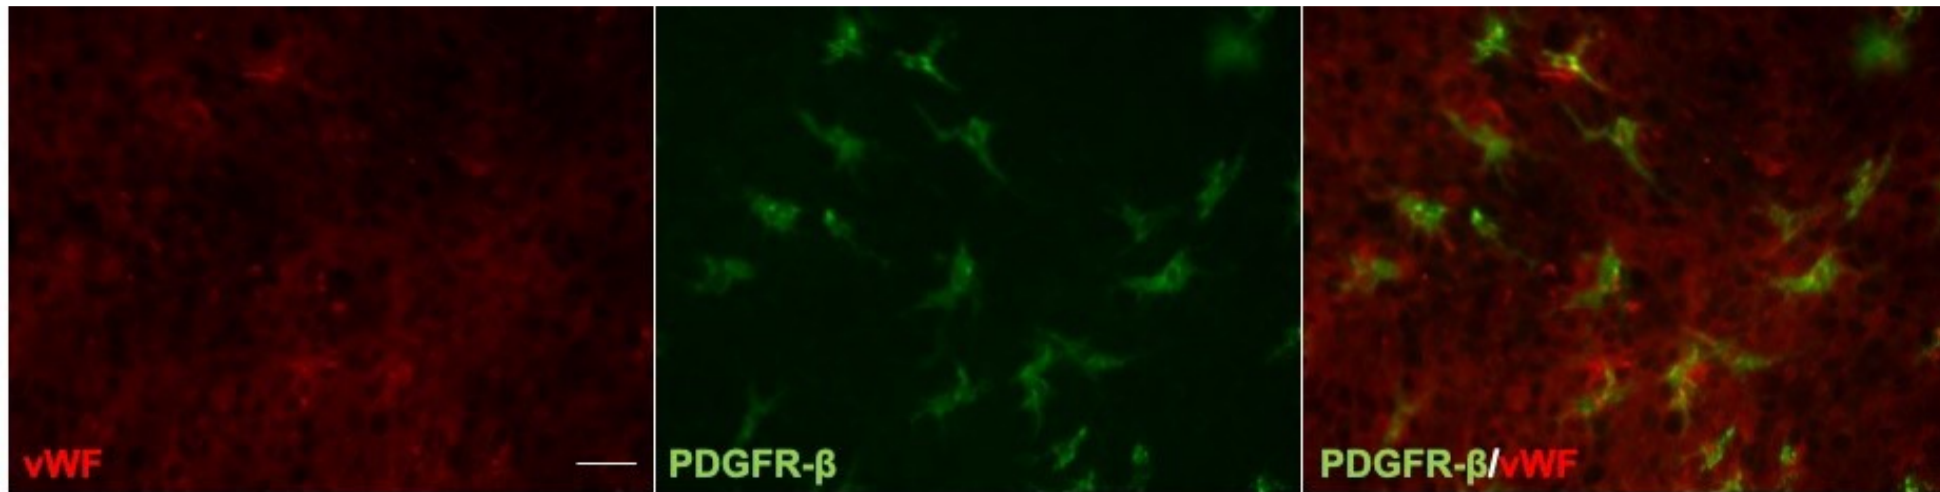

Supplement: d3ra04704k1.pdf [file d3ra04704k1.pdf]
